# Supplementary material for: Advanced Quantitative Lipoprotein Characteristics Do Not Relate to Healthy Dietary Patterns in Adults from a Mediterranean Area
Source: MDPI journal article supplement (doi:10.3390/nu13124369), 2021-12-06
Supplement: s1 [file s1]

## Supplementary Materials

**Table S1:** Clinical characteristics and the alternate Mediterranean Diet score (aMED) by population

| Characteristics           | Controls             |                    |                     |       | T1DM                |                   |                    |       | T2DM                |                   |                     |       |
|---------------------------|----------------------|--------------------|---------------------|-------|---------------------|-------------------|--------------------|-------|---------------------|-------------------|---------------------|-------|
|                           | T1 [0,4]<br>(N= 371) | T2 [4]<br>(N= 110) | T3 [5,9]<br>(N=187) | P     | T1 [0,4]<br>(N= 90) | T2 [4]<br>(N= 54) | T3 [5,9]<br>(N=78) | P     | T1 [0,4]<br>(N= 79) | T2 [4]<br>(N= 70) | T3 [5,9]<br>(N=103) | p     |
| Age (years)               | 48.0 (13.1)          | 50.0 (13.4)        | 51.3 (12.2)         | 0.014 | 42.9 (10.4)         | 44.4 (11.7)       | 46.4 (9.9)         | 0.098 | 56.1 (9.5)          | 59.5 (8.6)        | 59.9 (9.8)          | 0.017 |
| Sex (women)               | 202 (54.4)           | 65 (59.1)          | 124 (66.3)          |       | 49 (54.4)           | 25 (46.3)         | 45 (57.7)          |       | 40 (50.6)           | 32 (45.7)         | 49 (47.6)           |       |
| Educational level         |                      |                    |                     | 0.444 |                     |                   |                    | 0.159 |                     |                   |                     | 0.859 |
| Undergraduate             | 311 (84.0)           | 87 (80.6)          | 149 (80.2)          |       | 68 (80.0)           | 35 (70.0)         | 51 (67.1)          |       | 69 (93.2)           | 63 (92.6)         | 92 (91.1)           |       |
| Graduate or higher        | 59 (15.9)            | 21 (19.4)          | 37 (19.9)           |       | 17 (20.0)           | 15 (30.0)         | 25 (32.9)          |       | 5 (6.8)             | 5 (7.3)           | 9 (8.9)             |       |
| Tobacco exposure          | 203 (54.7)           | 55 (50)            | 90 (48.1)           | 0.055 | 45 (49.4)           | 26 (48.2)         | 41 (52.6)          | 0.240 | 46 (58.2)           | 33 (47.1)         | 57 (55.3)           | 0.270 |
| Regular physical activity | 230 (62.8)           | 76 (73.1)          | 142 (76.8)          | 0.002 | 59 (66.3)           | 38 (70.4)         | 64 (82.1)          | 0.066 | 37 (46.8)           | 30 (42.9)         | 53 (51.5)           | 0.532 |
| BMI (Kg/m2)               | 26.2 (4.6)           | 26.3 (4.7)         | 25.8 (4.2)          | 0.593 | 25.8 (4.6)          | 25.5 (3.4)        | 25.5 (3.7)         | 0.858 | 32.0 (5.5)          | 32.5 (5.3)        | 30.8 (5.5)          | 0.084 |
| Waist (cm)                | 93.7 (12.4)          | 94.6 (13.3)        | 91.8 (11.7)         | 0.114 | 89.5 (12.6)         | 88.5 (11.9)       | 87.8 (11.8)        | 0.678 | 107 (11.4)          | 108 (10.6)        | 103 (12.3)          | 0.012 |
| SBP (mmHg)                | 123.0 (15.9)         | 122.0 (19.3)       | 123.0 (15.7)        | 0.744 | 127.0 (17.5)        | 127.0 (18.0)      | 126.0 (17.6)       | 0.887 | 138.0 (20.3)        | 140.0 (17.4)      | 139.0 (18.3)        | 0.685 |
| DBP (mmHg)                | 76.8 (9.65)          | 76.6 (10.6)        | 77.0 (9.62)         | 0.934 | 74.8 (9.19)         | 74.9 (9.71)       | 72.7 (10.0)        | 0.283 | 77.1 (10.2)         | 76.3 (10.7)       | 76.1 (10.6)         | 0.806 |
| Hypertension              | 49 (13.2)            | 15 (13.6)          | 35 (18.7)           | 0.209 | 19 (21.1)           | 18 (33.3)         | 18 (23.1)          | 0.236 | 44 (55.7)           | 39 (55.7)         | 58 (56.3)           | 0.995 |
| Dyslipidemia              | 62 (16.7)            | 27 (24.5)          | 48 (25.7)           | 0.024 | 38 (42.2)           | 23 (42.6)         | 30 (38.5)          | 0.852 | 33 (41.8)           | 39 (55.7)         | 48 (46.6)           | 0.227 |
| HbA1c (mmol/mol)          | 36.2 (4.6)           | 36.3 (4.1)         | 36.9 (4.2)          | 0.147 | 60.9 (11.1)         | 57.5 (8.7)        | 59.7 (9.8)         | 0.149 | 60.7 (16.7)         | 63.6 (16.1)       | 61.0 (14.4)         | 0.468 |
| HbA1c (%)                 | 5.46 (0.42)          | 5.47 (0.38)        | 5.53 (0.38)         | 0.174 | 7.73 (1.01)         | 7.41 (0.80)       | 7.61 (0.89)        | 0.149 | 7.72 (1.52)         | 7.97 (1.47)       | 7.74 (1.32)         | 0.494 |
| Total cholesterol (mg/dL) | 196.0 (36.0)         | 203.0 (35.6)       | 203.0 (38.2)        | 0.070 | 176.0 (31.3)        | 182.0 (27.9)      | 185.0 (25.6)       | 0.122 | 192.0 (36.5)        | 180.0 (35.7)      | 185.0 (38.1)        | 0.151 |
| HDL-cholesterol (mg/dL)   | 58.9 (15.9)          | 59.6 (14.1)        | 61.3 (14.9)         | 0.217 | 62.0 (17.2)         | 65.1 (16.4)       | 66.5 (13.7)        | 0.174 | 49.3 (14.9)         | 48.6 (11.5)       | 51.3 (13.1)         | 0.364 |
| LDL-cholesterol (mg/dL)   | 117.0 (30.3)         | 123.0 (31.1)       | 123.0 (32.8)        | 0.042 | 99.8 (25.2)         | 102.0 (23.4)      | 105.0 (22.4)       | 0.363 | 114.0 (28.7)        | 103.0 (30.7)      | 110.0 (32.6)        | 0.087 |
| Triglycerides (mg/dL)     | 108.0 (90.0)         | 103.0 (55.4)       | 97.2 (53.4)         | 0.303 | 73.5 (32.9)         | 71.9 (24.7)       | 78.8 (53.0)        | 0.554 | 148.0 (149)         | 153.0 (100)       | 125.0 (64.4)        | 0.173 |

Data are shown as n (%) for categorical variables and mean (SD) for continuous variables. BMI, body mass index; DBP, diastolic blood pressure; HbA1c, glycated hemoglobin; HDL-cholesterol, high density lipoprotein-cholesterol; LDL-cholesterol, low density lipoprotein-cholesterol; SBP, systolic blood pressure.

P was calculated according to the method of Benjamini and Hochberg for multiple comparisons.

**Table S2:** Clinical characteristics and the alternate Healthy Eating Index (aHEI) by population

| Characteristics           | Controls               |                        |                       |        | T1DM                  |                       |                      |        | T2DM                  |                       |                       |       |
|---------------------------|------------------------|------------------------|-----------------------|--------|-----------------------|-----------------------|----------------------|--------|-----------------------|-----------------------|-----------------------|-------|
|                           | T1 [20-38]<br>(N= 371) | T2 [38-44]<br>(N= 110) | T3 [44-68]<br>(N=187) | P      | T1 [20-38]<br>(N= 90) | T2 [38-44]<br>(N= 54) | T3 [44-68]<br>(N=78) | P      | T1 [20-38]<br>(N= 79) | T2 [38-44]<br>(N= 70) | T3 [44-68]<br>(N=103) | p     |
| Age (years)               | 47.0 (12.3)            | 49.0 (12.6)            | 54.5 (13.4)           | <0.001 | 41.8 (9.8)            | 43.0 (9.7)            | 48.8 (11.2)          | <0.001 | 55.8 (10.3)           | 58.0 (9.4)            | 59.8 (9.1)            | 0.050 |
| Sex (women)               | 157 (50.6)             | 128 (60.4)             | 106 (72.6)            | <0.001 | 36 (49.3)             | 38 (49.4)             | 45 (62.5)            | 0.183  | 13 (30.2)             | 37 (46.2)             | 71 (55.0)             | 0.017 |
| Educational level         |                        |                        |                       | 0.678  |                       |                       |                      | 0.350  |                       |                       |                       | 0.812 |
| Undergraduate             | 252 (81.6)             | 172 (81.9)             | 123 (84.8)            |        | 52 (77.6)             | 49 (67.1)             | 53 (74.6)            |        | 38 (90.5)             | 72 (93.5)             | 114 (91.9)            |       |
| Graduate or higher        | 57 (18.4)              | 38 (18.1)              | 22 (15.2)             |        | 15 (22.4)             | 24 (32.9)             | 18 (25.4)            |        | 4 (9.5)               | 5 (6.3)               | 10 (7.8)              |       |
| Tobacco exposure          | 195 (62.9)             | 99 (46.7)              | 54 (36.9)             | <0.001 | 36 (49.3)             | 40 (52.0)             | 36 (50.0)            | 0.450  | 32 (74.4)             | 45 (56.3)             | 59 (45.7)             | 0.001 |
| Regular physical activity | 184 (61.1)             | 155 (73.8)             | 109 (75.7)            | 0.001  | 50 (69.4)             | 52 (67.5)             | 59 (81.9)            | 0.104  | 20 (46.5)             | 42 (52.5)             | 58 (45.0)             | 0.563 |
| BMI (Kg/m2)               | 26.0 (4.51)            | 26.3 (4.6)             | 26.1 (4.2)            | 0.646  | 25.9 (4.4)            | 25.6 (4.3)            | 25.4 (3.3)           | 0.797  | 31.1 (4.9)            | 32.7 (6.1)            | 31.2 (5.2)            | 0.136 |
| Waist (cm)                | 93.3 (13.0)            | 93.8 (12.1)            | 92.7 (11.4)           | 0.693  | 89.3 (12.3)           | 89.4 (12.4)           | 87.2 (11.7)          | 0.486  | 105 (10.6)            | 108 (12.3)            | 104 (11.6)            | 0.038 |
| SBP (mmHg)                | 122.0 (15.4)           | 123.0 (17.6)           | 123.0 (16.7)          | 0.666  | 126.0 (19.2)          | 126.0 (15.5)          | 127.0 (18.2)         | 0.830  | 137.0 (20.1)          | 140.0 (20.0)          | 139.0 (17.4)          | 0.635 |
| DBP (mmHg)                | 76.5 (9.0)             | 77.4 (10.4)            | 76.7 (10.4)           | 0.561  | 74.1 (9.5)            | 75.0 (9.1)            | 73.2 (10.4)          | 0.502  | 77.5 (9.4)            | 78.5 (10.3)           | 74.9 (10.7)           | 0.041 |
| Hypertension              | 36 (11.6)              | 29 (13.7)              | 34 (23.3)             | 0.004  | 13 (17.8)             | 20 (26.0)             | 22 (30.6)            | 0.197  | 22 (51.2)             | 46 (57.5)             | 73 (56.6)             | 0.779 |
| Dyslipidemia              | 52 (16.8)              | 37 (17.5)              | 48 (32.9)             | <0.001 | 26 (35.6)             | 33 (42.9)             | 32 (44.4)            | 0.512  | 18 (41.9)             | 36 (45.0)             | 66 (51.2)             | 0.486 |
| HbA1c (mmol/mol)          | 36.0 (4.40)            | 36.7 (4.4)             | 36.8 (4.4)            | 0.121  | 61.4 (11.2)           | 58.0 (8.8)            | 59.7 (10.2)          | 0.110  | 57.5 (15.0)           | 60.4 (15.8)           | 63.8 (15.4)           | 0.053 |
| HbA1c (%)                 | 5.5 (0.4)              | 5.5 (0.4)              | 5.5 (0.4)             | 0.130  | 7.8 (1.0)             | 7.5 (0.1)             | 7.6 (0.9)            | 0.110  | 7.4 (1.4)             | 7.7 (1.5)             | 8.0 (1.4)             | 0.065 |
| Total cholesterol (mg/dL) | 197.0 (36.0)           | 197.0 (36.0)           | 207.0 (38.3)          | 0.023  | 177.0 (27.6)          | 182.0 (30.2)          | 182.0 (28.2)         | 0.399  | 187.0 (36.3)          | 181.0 (39.1)          | 188.0 (36.1)          | 0.481 |
| HDL-cholesterol (mg/dL)   | 59.4 (15.8)            | 59.7 (15.5)            | 60.3 (14.1)           | 0.858  | 61.3 (15.6)           | 64.9 (17.5)           | 66.9 (14.2)          | 0.104  | 50.4 (16.6)           | 49.1 (13.6)           | 50.3 (11.9)           | 0.813 |
| LDL-cholesterol (mg/dL)   | 118.0 (30.8)           | 119.0 (31.0)           | 126.0 (32.2)          | 0.048  | 101.0 (23.8)          | 103.0 (24.9)          | 102.0 (22.9)         | 0.842  | 110.0 (26.6)          | 105.0 (33.2)          | 112.0 (31.1)          | 0.344 |
| Triglycerides (mg/dL)     | 108.0 (94.9)           | 97.0 (56.5)            | 105.0 (53.0)          | 0.241  | 73.8 (27.4)           | 76.9 (47.5)           | 74.1 (41.3)          | 0.868  | 149.0 (193)           | 141.0 (95.0)          | 136.0 (69.4)          | 0.773 |

Data are shown as n (%) for categorical variables and mean (SD) for continuous variables. BMI, body mass index; DBP, diastolic blood pressure; HbA1c, glycated hemoglobin; HDL-cholesterol, high density lipoprotein-cholesterol; LDL-cholesterol, low density lipoprotein-cholesterol; SBP, systolic blood pressure.

P was calculated according to the method of Benjamini and Hochberg for multiple comparisons.

**Table S3:** Daily nutrient intake by the alternate Mediterranean Diet score and the alternate Healthy Eating Index

| Nutrients<br>(units/day)    | aMED                 |                    |                     |        | aHEI                    |                       |                       |        |
|-----------------------------|----------------------|--------------------|---------------------|--------|-------------------------|-----------------------|-----------------------|--------|
|                             | T1 [0-4]<br>(N= 540) | T2 [4]<br>(N= 234) | T3 [5-9]<br>(N=368) | P      | T1 [20-38]<br>(N = 426) | T2 [38-44]<br>(N=369) | T3 [44-68]<br>(N=347) | P      |
| <b>Energy intake (kcal)</b> | <b>2116 (585)</b>    | 2179 (610)         | 2161 (534)          | 0.247  | 2166 (602)              | 2136 (591)            | 2125 (521)            | 0.316  |
| Proteins (g)                | 96.5 (14.4)          | 97.0 (17.3)        | 98.5 (18.7)         | 0.101  | 94.1 (13.9)             | 96.3 (14.6)           | 102 (20.0)            | <0.001 |
| Carbohydrates (g)           | 206 (38.0)           | 206 (43.6)         | 207 (35.1)          | 0.883  | 199 (38.1)              | 204 (36.3)            | 218 (37.9)            | <0.001 |
| Complex carbohydrates (g)   | 90.9 (21.2)          | 87.4 (21.1)        | 88.2 (19.5)         | 0.059  | 89.3 (21.7)             | 87.6 (19.6)           | 91.1 (20.5)           | 0.276  |
| Sugar (g)                   | 80.5 (27.9)          | 84.7 (35.0)        | 84.9 (24.7)         | 0.030  | 76.9 (26.6)             | 81.7 (25.7)           | 91.3 (31.8)           | <0.001 |
| Added sugar (g)             | 26.2 (19.7)          | 22.6 (26.2)        | 18.7 (15.9)         | <0.001 | 26.9 (20.0)             | 21.9 (17.8)           | 19.5 (22.7)           | <0.001 |
| Gycemic load (%)            | 96.1 (21.6)          | 91.9 (23.0)        | 89.1 (18.5)         | <0.001 | 92.7 (22.8)             | 91.8 (20.1)           | 94.7 (20.1)           | 0.269  |
| Total fat (g)               | 93.4 (17.2)          | 93.9 (17.7)        | 92.9 (15.2)         | 0.765  | 94.5 (17.2)             | 96.0 (16.6)           | 89.2 (15.2)           | <0.001 |
| Saturated fat (g)           | 26.8 (5.29)          | 24.7 (5.03)        | 23.6 (4.81)         | <0.001 | 27.1 (5.41)             | 25.7 (4.63)           | 22.8 (4.82)           | <0.001 |
| Monounsaturated fat (g)     | 44.6 (11.9)          | 46.9 (12.9)        | 46.6 (10.9)         | 0.017  | 45.7 (12.2)             | 47.9 (11.8)           | 43.5 (11.0)           | 0.027  |
| Polyunsaturated fat (g)     | 15.1 (4.69)          | 15.6 (4.04)        | 16.2 (4.35)         | 0.002  | 14.9 (3.85)             | 15.7 (4.44)           | 16.2 (5.08)           | <0.001 |
| Omega 3 (g)                 | 1.47 (0.32)          | 1.65 (0.57)        | 1.74 (0.52)         | <0.001 | 1.44 (0.27)             | 1.60 (0.35)           | 1.78 (0.65)           | <0.001 |
| Omega 6 (g)                 | 13.5 (4.66)          | 13.8 (3.97)        | 14.3 (4.27)         | 0.017  | 13.3 (3.79)             | 14.0 (4.41)           | 14.3 (5.03)           | 0.003  |
| Daily food intake (g/day)   |                      |                    |                     |        |                         |                       |                       |        |
| Dairy products              | 360.0 (215.0)        | 351.0 (245.0)      | 330.0 (218.0)       | 0.051  | 347.0 (223.0)           | 347.0 (216.0)         | 352.0 (229.0)         | 0.774  |
| Eggs                        | 21.7 (18.3)          | 21.6 (16.7)        | 19.5 (11.9)         | 0.049  | 21.1 (12.4)             | 21.7 (21.3)           | 20.2 (13.9)           | 0.436  |
| White meat                  | 34.6 (17.9)          | 39.1 (23.1)        | 40.4 (35.2)         | 0.001  | 30.9 (16.9)             | 36.5 (16.6)           | 46.3 (37.7)           | <0.001 |
| Red meat                    | 63.7 (33.1)          | 49.5 (28.6)        | 44.2 (25.4)         | <0.001 | 63.5 (34.2)             | 56.0 (28.0)           | 41.7 (25.8)           | <0.001 |
| Processed meat              | 41.5 (27.8)          | 35.2 (21.9)        | 28.3 (20.0)         | <0.001 | 43.3 (27.2)             | 35.2 (23.5)           | 27.7 (20.6)           | <0.001 |
| Meat                        | 140.0 (46.5)         | 124.0 (45.1)       | 112.0 (46.4)        | <0.001 | 138.0 (49.3)            | 128.0 (39.7)          | 115.0 (50.6)          | <0.001 |
| Lean fish                   | 24.7 (19.1)          | 35.1 (22.4)        | 40.4 (34.9)         | <0.001 | 23.6 (18.5)             | 31.7 (19.7)           | 42.2 (36.5)           | <0.001 |
| Fatty fish                  | 24.8 (21.3)          | 35.2 (50.2)        | 42.2 (53.2)         | <0.001 | 23.1 (17.3)             | 30.5 (25.6)           | 46.3 (65.0)           | <0.001 |
| Seafood                     | 10.4 (9.8)           | 12.0 (10.7)        | 12.6 (9.7)          | 0.001  | 10.6 (7.79)             | 11.5 (12.2)           | 12.3 (9.72)           | 0.015  |
| Fish                        | 59.8 (34.5)          | 82.2 (59.5)        | 95.1 (70.4)         | <0.001 | 57.2 (30.3)             | 73.7 (36.2)           | 101.0 (82.0)          | <0.001 |
| Fruits and vegetables       | 381.0 (192.0)        | 545.0 (227.0)      | 611.0 (223.0)       | <0.001 | 318.0 (127.0)           | 498.0 (166.0)         | 689.0 (236.0)         | <0.001 |
| Nuts                        | 5.3 (7.3)            | 8.3 (8.8)          | 14.7 (15.8)         | <0.001 | 5.4 (6.7)               | 7.9 (9.0)             | 14.4 (16.4)           | <0.001 |

|                            |                |                |                |        |               |               |               |        |
|----------------------------|----------------|----------------|----------------|--------|---------------|---------------|---------------|--------|
| Legumes                    | 21.3 (17.9)    | 24.3 (20.7)    | 38.1 (35.8)    | <0.001 | 24.1 (19.6)   | 26.5 (22.6)   | 32.1 (35.9)   | <0.001 |
| Cereal and pasta           | 70.2 (42.8)    | 72.8 (45.9)    | 72.7 (47.5)    | 0.390  | 70.8 (41.1)   | 71.2 (44.8)   | 72.8 (49.5)   | 0.546  |
| Potatoes                   | 52.8 (34.6)    | 54.9 (58.9)    | 54.1 (37.7)    | 0.618  | 51.4 (49.8)   | 55.2 (34.8)   | 54.8 (37.1)   | 0.242  |
| Bred                       | 119.0 (71.9)   | 102.0 (54.9)   | 98.5 (58.9)    | <0.001 | 116.0 (71.4)  | 106.0 (62.6)  | 104.0 (59.6)  | 0.008  |
| Sweets                     | 38.0 (37.8)    | 35.0 (39.7)    | 31.1 (31.4)    | 0.005  | 37.9 (40.1)   | 35.7 (35.1)   | 31.2 (32.4)   | 0.012  |
| Vegetable fats             | 28.5 (19.1)    | 32.3 (18.8)    | 33.2 (18.1)    | <0.001 | 29.9 (19.1)   | 34.5 (20.2)   | 28.0 (16.3)   | 0.268  |
| Animal fats                | 0.4 (1.6)      | 0.3 (1.0)      | 0.4 (2.0)      | 0.891  | 0.4 (1.9)     | 0.3 (0.8)     | 0.4 (2.0)     | 0.469  |
| Alcohol drinks             | 102.0 (180.0)  | 117.0 (163.0)  | 112.0 (141.0)  | 0.325  | 162.0 (223.0) | 86.7 (117.0)  | 66.3 (93.4)   | <0.001 |
| Non-alcoholic<br>beverages | 1366.0 (547.0) | 1356.0 (495.0) | 1406.0 (574.0) | 0.309  | 1355.0 (559)  | 1403 (506)    | 1376 (571)    | 0.548  |
| Coffee and tea             | 393 (297)      | 408 (313)      | 378 (275)      | 0.527  | 395.0 (291.0) | 410.0 (303.0) | 366.0 (286.0) | 0.204  |
| Prepared meals             | 80.8 (75.3)    | 86.9 (119)     | 77.2 (64.7)    | 0.599  | 72.2 (63.6)   | 81.7 (94.2)   | 90.6 (90.6)   | 0.002  |
| Salt                       | 0.60 (0.77)    | 0.58 (0.74)    | 0.45 (0.65)    | 0.003  | 0.70 (0.82)   | 0.59 (0.74)   | 0.32 (0.52)   | <0.001 |

Data are shown as n (%) for categorical variables and mean (SD) for continuous variables.

P was calculated according to the method of Benjamini and Hochberg for multiple comparisons.

**Table S4:** The advanced lipoprotein profile and the alternate Mediterranean Diet score (aMED) by population

| NMR variable               | Controls       |                |                |       | T1DM           |                |                |       | T2DM           |                |                |       |
|----------------------------|----------------|----------------|----------------|-------|----------------|----------------|----------------|-------|----------------|----------------|----------------|-------|
|                            | T1 [0,4]       | T2 [4]         | T3 [5,9]       | P     | T1 [0,4]       | T2 [4]         | T3 [5,9]       | P     | T1 [0,4]       | T2 [4]         | T3 [5,9]       | p     |
|                            | (N= 371)       | (N= 110)       | (N=187)        |       | (N= 90)        | (N= 54)        | (N=78)         |       | (N= 79)        | (N= 70)        | (N=103)        |       |
| VLDL-P number (nmol/L)     |                |                |                |       |                |                |                |       |                |                |                |       |
| Total                      | 49.3 (38.0)    | 45.5 (28.8)    | 41.4 (24.7)    | 0.021 | 32.2 (15.0)    | 29.6 (12.0)    | 33.6 (27.3)    | 0.750 | 71.3 (62.2)    | 80.0 (55.3)    | 60.9 (36.7)    | 0.609 |
| Large                      | 1.2 (0.8)      | 1.1 (0.6)      | 1.0 (0.5)      | 0.012 | 0.9 (0.4)      | 0.8 (0.3)      | 0.9 (0.5)      | 0.750 | 1.7 (1.36)     | 1.9 (1.09)     | 1.5 (0.7)      | 0.609 |
| Medium                     | 5.0 (5.7)      | 4.6 (3.7)      | 4.2 (2.4)      | 0.055 | 3.1 (1.7)      | 3.2 (1.6)      | 3.7 (3.9)      | 0.486 | 6.8 (9.6)      | 7.3 (8.7)      | 5.5 (3.9)      | 0.624 |
| Small                      | 43.1 (32.6)    | 39.9 (25.1)    | 36.3 (22.3)    | 0.021 | 28.2 (13.1)    | 25.6 (10.5)    | 29.1 (23.1)    | 0.771 | 62.9 (51.9)    | 70.9 (47.0)    | 53.9 (32.6)    | 0.609 |
| VLDL-P composition (mg/dL) |                |                |                |       |                |                |                |       |                |                |                |       |
| VLDL-C                     | 12.0 (11.1)    | 11.0 (9.0)     | 10.0 (7.7)     | 0.039 | 7.9 (5.9)      | 7.3 (5.4)      | 8.4 (9.5)      | 0.750 | 17.8 (16.6)    | 19.6 (14.7)    | 15.2 (11.7)    | 0.624 |
| VLDL-TG                    | 71.4 (57.6)    | 65.6 (41.6)    | 59.4 (33.9)    | 0.021 | 45.9 (20.5)    | 42.4 (15.6)    | 48.4 (39.5)    | 0.750 | 102 (98.3)     | 115 (85.6)     | 86.6 (50.8)    | 0.609 |
| VLDL-P size (nm)           | 42.1 (0.2)     | 42.1 (0.2)     | 42.1 (0.2)     | 0.430 | 42.1 (0.2)     | 42.2 (0.3)     | 42.1 (0.23)    | 0.619 | 42.0 (0.20)    | 42.0 (0.24)    | 42.0 (0.20)    | 0.624 |
| LDL-P number (nmol/L)      |                |                |                |       |                |                |                |       |                |                |                |       |
| Total                      | 1307.0 (270.0) | 1383.0 (276.0) | 1377.0 (296.0) | 0.012 | 1249.0 (196.0) | 1274.0 (210.0) | 1284.0 (190.0) | 0.486 | 1339.0 (249.0) | 1269.0 (263.0) | 1327.0 (275.0) | 0.905 |
| Large                      | 184.0 (34.2)   | 192.0 (37.7)   | 195.0 (38.8)   | 0.006 | 180.0 (30.1)   | 184.0 (29.3)   | 183.0 (30.0)   | 0.583 | 179.0 (33.8)   | 165.0 (34.7)   | 175.0 (33.1)   | 0.835 |
| Medium                     | 411.0 (134.0)  | 453.0 (143.0)  | 462.0 (154.0)  | 0.001 | 404.0 (110.0)  | 424.0 (106.0)  | 422.0 (110.0)  | 0.502 | 402.0 (137.0)  | 352.0 (130.0)  | 394.0 (134.0)  | 0.887 |
| Small                      | 711.0 (147.0)  | 738.0 (140.0)  | 720.0 (143.0)  | 0.460 | 664.0 (86.4)   | 666.0 (103.0)  | 678.0 (93.5)   | 0.516 | 758.0 (129.0)  | 751.0 (131.0)  | 759.0 (141.0)  | 0.941 |
| LDL-P composition (mg/dL)  |                |                |                |       |                |                |                |       |                |                |                |       |
| LDL-C                      | 127.0 (26.7)   | 136.0 (27.6)   | 135.0 (29.8)   | 0.006 | 123.0 (20.2)   | 126.0 (20.6)   | 126.0 (20.5)   | 0.513 | 127.0 (25.1)   | 118.0 (25.7)   | 125.0 (27.4)   | 0.887 |
| LDL-TG                     | 16.3 (5.0)     | 17.2 (5.4)     | 17.7 (5.4)     | 0.008 | 15.6 (4.6)     | 16.4 (4.5)     | 16.6 (4.0)     | 0.486 | 18.0 (5.4)     | 17.0 (5.4)     | 17.7 (4.8)     | 0.887 |
| LDL-P size (nm)            | 21.0 (0.27)    | 21.0 (0.26)    | 21.1 (0.26)    | 0.012 | 21.0 (0.2)     | 21.1 (0.2)     | 21.1 (0.2)     | 0.750 | 20.9 (0.4)     | 20.8 (0.3)     | 20.8 (0.2)     | 0.835 |
| HDL-P number (μmol/L)      |                |                |                |       |                |                |                |       |                |                |                |       |
| Total                      | 28.9 (5.7)     | 29.8 (5.7)     | 29.7 (5.3)     | 0.181 | 31.2 (6.5)     | 32.9 (6.7)     | 33.0 (4.9)     | 0.397 | 27.1 (6.2)     | 26.5 (4.7)     | 28.0 (5.5)     | 0.624 |

|                             |                   |                   |                   |       |                   |                   |                   |       |                   |                   |                   |       |
|-----------------------------|-------------------|-------------------|-------------------|-------|-------------------|-------------------|-------------------|-------|-------------------|-------------------|-------------------|-------|
| Large                       | 0.3 (0.1)         | 0.3 (0.1)         | 0.3 (0.1)         | 0.055 | 0.3 (0.1)         | 0.3 (0.1)         | 0.3 (0.1)         | 0.397 | 0.26<br>(0.06)    | 0.26<br>(0.04)    | 0.27<br>(0.04)    | 0.814 |
| Medium                      | 9.4 (2.2)         | 9.4 (2.1)         | 9.7 (2.0)         | 0.276 | 10.5<br>(2.6)     | 11.0<br>(2.9)     | 11.1<br>(2.3)     | 0.486 | 8.1 (1.9)         | 8.0 (1.5)         | 8.5 (1.9)         | 0.609 |
| Small                       | 19.3 (4.2)        | 20.1 (4.4)        | 19.7<br>(3.8)     | 0.216 | 20.4<br>(4.5)     | 21.6<br>(4.4)     | 21.6<br>(3.5)     | 0.397 | 18.7<br>(5.1)     | 18.2<br>(3.8)     | 19.2 (4.4)        | 0.828 |
| HDL-P composition (mg/dL)   |                   |                   |                   |       |                   |                   |                   |       |                   |                   |                   |       |
| HDL-C                       | 56.0 (12.7)       | 57.3 (12.1)       | 57.9<br>(11.4)    | 0.119 | 62.5<br>(15.3)    | 66.3<br>(15.1)    | 66.0<br>(11.8)    | 0.486 | 49.5<br>(12.2)    | 48.0<br>(9.5)     | 51.9<br>(11.4)    | 0.609 |
| HDL-TG                      | 13.6 (4.7)        | 13.8 (4.5)        | 13.6<br>(4.7)     | 0.909 | 13.5<br>(3.6)     | 13.9<br>(4.0)     | 14.8<br>(4.2)     | 0.397 | 14.0<br>(5.6)     | 14.3<br>(4.0)     | 14.1 (4.5)        | 0.887 |
| HDL-P size (nm)             | 8.2 (0.1)         | 8.2 (0.1)         | 8.2 (0.1)         | 0.909 | 8.2 (0.1)         | 8.2 (0.1)         | 8.2 (0.1)         | 0.892 | 8.2 (0.1)         | 8.2 (0.1)         | 8.2 (0.1)         | 0.887 |
| IDL-P composition (mg/dL)   |                   |                   |                   |       |                   |                   |                   |       |                   |                   |                   |       |
| IDL-C                       | 9.9 (4.6)         | 10.6 (4.7)        | 10.5<br>(4.4)     | 0.169 | 123.0<br>(20.2)   | 126.0<br>(20.6)   | 126.0<br>(20.5)   | 0.513 | 13.2<br>(5.3)     | 13.7<br>(5.4)     | 13.0 (4.9)        | 0.887 |
| IDL-TG                      | 16.3 (5.0)        | 17.2 (5.4)        | 17.7<br>(5.4)     | 0.008 | 10.7<br>(3.2)     | 11.1<br>(3.3)     | 11.5<br>(4.0)     | 0.486 | 14.6<br>(4.3)     | 15.1<br>(4.6)     | 14.5 (4.1)        | 0.887 |
| Other atherogenic variables |                   |                   |                   |       |                   |                   |                   |       |                   |                   |                   |       |
| Non-HDL-P (nmol/L)          | 1327.0<br>(281.0) | 1399.0<br>(282.0) | 1388.0<br>(301.0) | 0.022 | 1249.0<br>(201.0) | 1271.0<br>(217.0) | 1284.0<br>(191.0) | 0.486 | 1383.0<br>(238.0) | 1322.0<br>(270.0) | 1360.0<br>(280.0) | 0.887 |
| Total-P/HDL-P               | 48.6 (13.7)       | 49.9 (14.1)       | 49.4<br>(14.1)    | 0.540 | 42.8<br>(11.8)    | 41.6<br>(13.7)    | 40.8<br>(8.5)     | 0.486 | 54.7<br>(15.0)    | 52.6<br>(14.9)    | 51.8<br>(15.9)    | 0.624 |
| LDL-P/HDL-P                 | 46.8 (13.0)       | 48.3 (13.5)       | 47.9<br>(13.7)    | 0.416 | 41.7<br>(11.4)    | 40.7<br>(13.3)    | 39.7<br>(8.2)     | 0.486 | 51.9<br>(14.5)    | 49.3<br>(13.6)    | 49.5<br>(15.1)    | 0.624 |

Data are shown as mean (SD). HDL high-density lipoprotein, HDL-C cholesterol content in HDL, HDL-P HDL particles, HDL-TG triglyceride content in HDL, IDL intermediate-density lipoprotein, IDL-C cholesterol content in IDL, IDL-TG triglyceride content in IDL, LDL low-density lipoprotein, LDL-C cholesterol content in LDL, LDL-P LDL particles, LDL-TG triglyceride content in LDL, NMR nuclear magnetic resonance, VLDL very low-density lipoprotein, VLDL-C cholesterol content in VLDL, VLDL-P VLDL particles, VLDL-TG triglyceride content in VLD. T1=poor adherence, T2=moderate adherence, and T3=high adherence

**Table S5:** The advanced lipoprotein profile and the alternate Healthy Eating Index (aHEI) scores stratified by study group

| NMR variable               | Controls       |                |                |       | T1DM           |                |                |       | T2DM           |                |                |       |
|----------------------------|----------------|----------------|----------------|-------|----------------|----------------|----------------|-------|----------------|----------------|----------------|-------|
|                            | T1             | T2             | T3             | p     | T1             | T2             | T3             | p     | T1             | T2             | T3             | p     |
|                            | [20,38]        | [38,44]        | [44,68]        |       | [20,38]        | [38,44]        | [44,68]        |       | [20,38]        | [38,44]        | [44,68]        |       |
|                            | (N = 310)      | (N=212)        | (N=146)        |       | (N = 73)       | (N=77)         | (N=72)         |       | (N = 43)       | (N=80)         | (N=129)        |       |
| VLDL-P number (nmol/L)     |                |                |                |       |                |                |                |       |                |                |                |       |
| Total                      | 48.6 (39.0)    | 43.9 (28.8)    | 45.7 (26.3)    | 0.335 | 32.5 (12.9)    | 32.9 (24.6)    | 30.7 (19.7)    | 0.946 | 70.6 (75.5)    | 70.7 (51.3)    | 68.3 (41.3)    | 0.868 |
| Large                      | 1.2 (0.8)      | 1.0 (0.6)      | 1.0 (0.6)      | 0.280 | 0.9 (0.3)      | 0.9 (0.5)      | 0.8 (0.4)      | 0.729 | 1.7 (1.7)      | 1.7 (1.0)      | 1.6 (0.8)      | 0.829 |
| Medium                     | 5.1 (6.3)      | 4.4 (2.7)      | 4.5 (2.4)      | 0.335 | 3.5 (1.8)      | 3.3 (3.1)      | 3.2 (2.9)      | 0.946 | 6.8 (12.4)     | 6.7 (8.3)      | 6.0 (4.0)      | 0.829 |
| Small                      | 42.4 (32.9)    | 38.4 (26.0)    | 40.1 (23.7)    | 0.357 | 28.2 (11.0)    | 28.8 (21.2)    | 26.6 (16.6)    | 0.946 | 62.1 (62.0)    | 62.3 (43.1)    | 60.7 (37.0)    | 0.879 |
| VLDL-P composition (mg/dL) |                |                |                |       |                |                |                |       |                |                |                |       |
| VLDL-C                     | 11.8 (11.1)    | 10.7 (9.0)     | 11.2 (8.5)     | 0.474 | 8.4 (6.0)      | 7.9 (8.4)      | 7.4 (7.2)      | 0.928 | 17.3 (19.6)    | 17.3 (14.0)    | 17.2 (12.5)    | 0.987 |
| VLDL-TG                    | 70.5 (60.5)    | 63.1 (39.4)    | 65.5 (35.5)    | 0.335 | 46.5 (17.2)    | 47.1 (34.8)    | 44.1 (28.5)    | 0.946 | 102.0 (122.0)  | 102.0 (80.2)   | 96.7 (57.3)    | 0.843 |
| VLDL-P size (nm)           | 42.1 (0.2)     | 42.1 (0.2)     | 42.1 (0.2)     | 0.335 | 42.2 (0.2)     | 42.1 (0.2)     | 42.1 (0.2)     | 0.826 | 42.0 (0.2)     | 42.0 (0.2)     | 42.0 (0.2)     | 0.899 |
| LDL-P number (nmol/L)      |                |                |                |       |                |                |                |       |                |                |                |       |
| Total                      | 1321.0 (276.0) | 1332.0 (277.0) | 1386.0 (293.0) | 0.100 | 1262.0 (209.0) | 1273.0 (197.0) | 1266.0 (187.0) | 0.994 | 1285.0 (250.0) | 1294.0 (274.0) | 1337.0 (263.0) | 0.699 |
| Large                      | 186.0 (35.4)   | 187.0 (34.9)   | 197.0 (39.3)   | 0.036 | 184.0 (31.2)   | 180.0 (28.2)   | 182.0 (30.3)   | 0.994 | 175.0 (35.5)   | 169.0 (35.8)   | 176.0 (32.4)   | 0.829 |
| Medium                     | 420.0 (140.0)  | 428.0 (140.0)  | 464.0 (148.0)  | 0.036 | 416.0 (116.0)  | 415.0 (101.0)  | 415.0 (111.0)  | 0.994 | 379.0 (122.0)  | 369.0 (139.0)  | 396.0 (137.0)  | 0.699 |
| Small                      | 716.0 (148.0)  | 717.0 (139.0)  | 725.0 (145.0)  | 0.561 | 662.0 (89.9)   | 677.0 (102.0)  | 669.0 (85.8)   | 0.946 | 731.0 (142.0)  | 756.0 (137.0)  | 765.0 (130.0)  | 0.699 |
| LDL-P composition (mg/dL)  |                |                |                |       |                |                |                |       |                |                |                |       |
| LDL-C                      | 129.0 (27.2)   | 130.0 (27.9)   | 136.0 (29.2)   | 0.065 | 125.0 (21.2)   | 125.0 (19.8)   | 125.0 (20.4)   | 0.994 | 122.0 (24.5)   | 121.0 (27.6)   | 126.0 (26.2)   | 0.699 |
| LDL-TG                     | 16.5 (5.3)     | 16.5 (4.8)     | 18.0 (5.4)     | 0.060 | 16.1 (5.0)     | 16.1 (4.2)     | 16.2 (3.9)     | 0.994 | 17.0 (4.9)     | 17.1 (5.5)     | 18.1 (5.0)     | 0.699 |
| LDL-P size (nm)            | 21.0 (0.3)     | 21.0 (0.3)     | 21.1 (0.3)     | 0.065 | 21.1 (0.2)     | 21.0 (0.2)     | 21.1 (0.3)     | 0.946 | 20.9 (0.4)     | 20.8 (0.3)     | 20.8 (0.2)     | 0.841 |

|                             |                |                |                |       |                |                |                |       |                |                |                |       |  |
|-----------------------------|----------------|----------------|----------------|-------|----------------|----------------|----------------|-------|----------------|----------------|----------------|-------|--|
| HDL-P number (μmol/L)       |                |                |                |       |                |                |                |       |                |                |                |       |  |
| Total                       | 29.1 (5.9)     | 29.1 (5.3)     | 29.9 (5.6)     | 0.335 | 31.0 (5.4)     | 32.1 (7.3)     | 33.8 (4.8)     | 0.046 | 26.9 (7.0)     | 26.8 (5.3)     | 27.7 (5.2)     | 0.699 |  |
| Large                       | 0.3 (0.1)      | 0.3 (0.1)      | 0.3 (0.1)      | 0.018 | 0.3 (0.1)      | 0.3 (0.1)      | 0.30 (0.04)    | 0.033 | 0.3 (0.1)      | 0.3 (0.0)      | 0.3 (0.0)      | 0.829 |  |
| Medium                      | 9.3 (2.2)      | 9.5 (2.1)      | 9.8 (2.1)      | 0.091 | 10.3 (2.4)     | 10.8 (3.1)     | 11.5 (2.0)     | 0.046 | 8.2 (2.3)      | 8.2 (1.7)      | 8.3 (1.7)      | 0.868 |  |
| Small                       | 19.6 (4.4)     | 19.3 (3.8)     | 19.8 (4.1)     | 0.714 | 20.4 (3.9)     | 21.1 (4.8)     | 21.9 (3.6)     | 0.099 | 18.4 (5.5)     | 18.4 (4.4)     | 19.1 (4.2)     | 0.699 |  |
| HDL-P composition (mg/dL)   |                |                |                |       |                |                |                |       |                |                |                |       |  |
| HDL-C                       | 56.2 (12.7)    | 56.7 (12.0)    | 58.0 (11.8)    | 0.335 | 61.7 (12.8)    | 64.5 (17.1)    | 67.9 (11.2)    | 0.056 | 50.0 (13.3)    | 49.1 (11.0)    | 50.6 (10.7)    | 0.840 |  |
| HDL-TG                      | 13.6 (4.6)     | 13.3 (4.8)     | 14.3 (4.6)     | 0.335 | 13.4 (3.4)     | 13.8 (4.3)     | 15.0 (4.0)     | 0.096 | 13.4 (7.2)     | 14.1 (3.7)     | 14.4 (4.3)     | 0.699 |  |
| HDL-P size (nm)             | 8.2 (0.1)      | 8.2 (0.1)      | 8.2 (0.1)      | 0.909 | 8.2 (0.1)      | 8.2 (0.1)      | 8.2 (0.1)      | 0.729 | 8.2 (0.1)      | 8.2 (0.1)      | 8.2 (0.1)      | 0.716 |  |
| IDL-P composition (mg/dL)   |                |                |                |       |                |                |                |       |                |                |                |       |  |
| IDL-C                       | 9.9 (4.6)      | 10.6 (4.7)     | 10.5 (4.4)     | 0.169 | 9.9 (4.9)      | 9.6 (4.6)      | 10.0 (4.1)     | 0.994 | 12.2 (4.6)     | 13.2 (5.2)     | 13.7 (5.3)     | 0.699 |  |
| IDL-TG                      | 16.3 (5.0)     | 17.2 (5.4)     | 17.7 (5.4)     | 0.008 | 11.1 (3.5)     | 11.0 (3.7)     | 11.2 (3.5)     | 0.994 | 13.6 (4.0)     | 14.4 (4.3)     | 15.2 (4.3)     | 0.652 |  |
| Other atherogenic variables |                |                |                |       |                |                |                |       |                |                |                |       |  |
| Non-HDL-P (nmol/L)          | 1327.0 (281.0) | 1399.0 (282.0) | 1388.0 (301.0) | 0.022 | 1264.0 (213.0) | 1273.0 (206.0) | 1263.0 (187.0) | 0.994 | 1329.0 (242.0) | 1337.0 (276.0) | 1378.0 (265.0) | 0.699 |  |
| Total-P/HDL-P               | 48.6 (13.7)    | 49.9 (14.1)    | 49.4 (14.1)    | 0.540 | 43.1 (11.1)    | 43.0 (13.8)    | 39.1 (7.5)     | 0.109 | 53.8 (16.8)    | 52.8 (14.8)    | 52.7 (15.2)    | 0.868 |  |
| LDL-P/HDL-P                 | 46.8 (13.0)    | 48.3 (13.5)    | 47.9 (13.7)    | 0.416 | 42.0 (10.7)    | 41.9 (13.3)    | 38.2 (7.4)     | 0.109 | 51.1 (16.5)    | 49.9 (13.7)    | 50.1 (14.4)    | 0.868 |  |

Data are shown as mean (SD). HDL high-density lipoprotein, HDL-C cholesterol content in HDL, HDL-P HDL particles, HDL-TG triglyceride content in HDL, IDL intermediate-density lipoprotein, IDL-C cholesterol content in IDL, IDL-TG triglyceride content in IDL, LDL low-density lipoprotein, LDL-C cholesterol content in LDL, LDL-P LDL particles, LDL-TG triglyceride content in LDL, NMR nuclear magnetic resonance, VLDL very low-density lipoprotein, VLDL-C cholesterol content in VLDL, VLDL-P VLDL particles, VLDL-TG triglyceride content in VLD. T1=poor adherence, T2=moderate adherence, and T3=high adherence



**Table S6:** The advanced lipoprotein profile, the alternate Mediterranean Diet score and the alternate Healthy Eating Index by age groups

| Characteristics                  | aMED                 |                   |                    |        |                       |                   |                    |       | aHEI                   |                       |                       |       |                        |                      |                       |       |
|----------------------------------|----------------------|-------------------|--------------------|--------|-----------------------|-------------------|--------------------|-------|------------------------|-----------------------|-----------------------|-------|------------------------|----------------------|-----------------------|-------|
|                                  | <50 years            |                   |                    |        | >50 years             |                   |                    |       | <50 years              |                       |                       |       | >50 years              |                      |                       |       |
|                                  | T1 [0-4]<br>(N= 173) | T2 [4]<br>(N= 55) | T3 [5-9]<br>(N=90) | P      | T1 [0-4]<br>(N = 140) | T2 [4]<br>(N=109) | T3 [5-9]<br>(N=69) | P     | T1 [20-38]<br>(N= 118) | T2 [38-44]<br>(N= 67) | T3 [44-68]<br>(N=128) | P     | T1 [20-38]<br>(N = 66) | T2 [38-44]<br>(N=94) | T3 [44-68]<br>(N=153) | p     |
| VLDL-P<br>number<br>(nmol/L)     |                      |                   |                    |        |                       |                   |                    |       |                        |                       |                       |       |                        |                      |                       |       |
| Total                            | 39.4 (27.2)          | 36.4 (20.2)       | 35.0 (23.5)        | 0.210  | 36.6 (23.4)           | 38.7 (27.2)       | 38.1 (25.2)        | 0.775 | 47.7 (25.2)            | 60.8 (42.9)           | 44.4 (27.5)           | 0.868 | 45.1 (26.1)            | 46.0 (28.2)          | 52.9 (34.5)           | 0.322 |
| Large                            | 1.0 (0.6)            | 0.9 (0.4)         | 0.9 (0.5)          | 0.086  | 0.9 (0.5)             | 1.0 (0.6)         | 1.0 (0.5)          | 0.775 | 1.1 (0.5)              | 1.4 (0.9)             | 1.1 (0.6)             | 0.868 | 1.1 (0.5)              | 1.1 (0.6)            | 1.25 (0.7)            | 0.322 |
| Medium                           | 3.98 (2.8)           | 3.56 (2.0)        | 3.3 (2.2)          | 0.072  | 3.8 (2.4)             | 3.7 (2.7)         | 3.6 (2.4)          | 0.775 | 4.42 (2.56)            | 5.53 (4.36)           | 4.37 (3.03)           | 0.957 | 4.2 (2.4)              | 4.6 (3.4)            | 4.9 (3.4)             | 0.378 |
| Small                            | 34.5 (24.3)          | 31.9 (18.2)       | 30.9 (21.1)        | 0.236  | 31.9 (20.9)           | 34.1 (24.3)       | 33.5 (22.6)        | 0.775 | 42.2 (22.7)            | 53.9 (38.2)           | 38.9 (24.3)           | 0.862 | 39.8 (23.7)            | 40.3 (24.7)          | 46.8 (30.9)           | 0.322 |
| VLDL-P<br>composition<br>(mg/dL) |                      |                   |                    |        |                       |                   |                    |       |                        |                       |                       |       |                        |                      |                       |       |
| VLDL-C                           | 9.56 (8.8)           | 8.59 (7.2)        | 8.6 (7.2)          | 0.357  | 8.9 (8.0)             | 9.2 (8.4)         | 9.3 (8.0)          | 0.775 | 11.9 (8.29)            | 15.1 (12.2)           | 10.6 (8.68)           | 0.862 | 11.0 (8.4)             | 11.0 (8.4)           | 13.1 (10.6)           | 0.325 |
| VLDL-TG                          | 56.8 (37.5)          | 52.1 (26.9)       | 49.4 (32.3)        | 0.164  | 52.7 (32.0)           | 55.3 (37.7)       | 54.1 (34.5)        | 0.775 | 67.6 (34.1)            | 86.5 (60.8)           | 64.0 (38.5)           | 0.868 | 64.0 (35.1)            | 66.3 (40.9)          | 75.2 (47.9)           | 0.322 |
| VLDL-P size<br>(nm)              | 42.1 (0.2)           | 42.1 (0.2)        | 42.1 (0.2)         | 0.027  | 42.2 (0.2)            | 42.1 (0.2)        | 42.1 (0.2)         | 0.085 | 42.1 (0.22)            | 42.0 (0.22)           | 42.1 (0.23)           | 0.862 | 42.1 (0.2)             | 42.1 (0.2)           | 42.1 (0.2)            | 0.473 |
| LDL-P number<br>(nmol/L)         |                      |                   |                    |        |                       |                   |                    |       |                        |                       |                       |       |                        |                      |                       |       |
| Total                            | 1204.0<br>(252.0)    | 1290.0<br>(241.0) | 1344.0<br>(304.0)  | <0.001 | 1218.0<br>(255.0)     | 1284.0<br>(284.0) | 1302.0<br>(277.0)  | 0.128 | 1398 (260)             | 1386 (243)            | 1366 (245)            | 0.862 | 1428.0<br>(249.0)      | 1351.0<br>(253.0)    | 1382.0<br>(247.0)     | 0.583 |
| Large                            | 178.0 (31.9)         | 189.0 (35.7)      | 195.0 (37.9)       | 0.001  | 182.0 (33.6)          | 185.0 (36.7)      | 189.0 (35.4)       | 0.323 | 195 (36.2)             | 187 (37.1)            | 190 (34.6)            | 0.862 | 201.0 (38.1)           | 186.0 (34.7)         | 190.0 (34.8)          | 0.325 |
| Medium                           | 386.0<br>(124.0)     | 438.0<br>(123.0)  | 470.0<br>(155.0)   | <0.001 | 405.0<br>(131.0)      | 426.0<br>(150.0)  | 437.0<br>(133.0)   | 0.303 | 466 (135)              | 445 (132)             | 457 (132)             | 0.873 | 492.0<br>(141.0)       | 436.0<br>(125.0)     | 456.0<br>(132.0)      | 0.384 |
| Small                            | 640.0<br>(131.0)     | 663.0<br>(112.0)  | 679.0<br>(141.0)   | 0.050  | 631.0<br>(122.0)      | 673.0<br>(132.0)  | 676.0<br>(141.0)   | 0.107 | 737 (131)              | 754 (123)             | 720 (117)             | 0.862 | 735.0<br>(109.0)       | 728.0<br>(134.0)     | 736.0<br>(125.0)      | 0.907 |
| LDL-P<br>composition<br>(mg/dL)  |                      |                   |                    |        |                       |                   |                    |       |                        |                       |                       |       |                        |                      |                       |       |
| LDL-C                            | 119.0 (24.8)         | 128.0 (24.1)      | 133.0 (30.6)       | <0.001 | 121.0 (25.5)          | 126.0 (29.0)      | 129.0 (26.9)       | 0.155 | 136 (26.1)             | 133 (25.0)            | 133 (25.7)            | 0.862 | 141.0 (25.8)           | 131.0 (25.1)         | 134.0 (25.7)          | 0.378 |
| LDL-TG                           | 15.3 (5.0)           | 17.1 (5.1)        | 17.9 (5.4)         | <0.001 | 15.9 (5.3)            | 16.6 (5.3)        | 16.9 (5.1)         | 0.323 | 18.5 (5.1)             | 18.8 (5.1)            | 18.4 (4.3)            | 0.957 | 19.0 (5.4)             | 17.6 (4.8)           | 18.9 (4.4)            | 0.834 |
| LDL-P size (nm)                  | 21.1 (0.3)           | 21.1 (0.2)        | 21.2 (0.2)         | 0.028  | 21.1 (0.2)            | 21.1 (0.2)        | 21.1 (0.2)         | 0.562 | 21.0 (0.3)             | 21.0 (0.3)            | 21.0 (0.3)            | 0.957 | 21.1 (0.3)             | 21.0 (0.25)          | 21.0 (0.26)           | 0.325 |

|                             |             |             |             |       |             |             |             |       |             |             |             |       |             |             |             |       |  |
|-----------------------------|-------------|-------------|-------------|-------|-------------|-------------|-------------|-------|-------------|-------------|-------------|-------|-------------|-------------|-------------|-------|--|
| HDL-P number                |             |             |             |       |             |             |             |       |             |             |             |       |             |             |             |       |  |
| (μmol/L)                    |             |             |             |       |             |             |             |       |             |             |             |       |             |             |             |       |  |
| Total                       | 30.4 (6.0)  | 32.6 (6.7)  | 31.2 (5.5)  | 0.231 | 30.6 (6.3)  | 30.9 (6.0)  | 32.0 (5.3)  | 0.323 | 31.1 (6.2)  | 31.5 (5.3)  | 31.4 (5.0)  | 0.905 | 31.5 (5.5)  | 31.6 (6.0)  | 31.1 (5.3)  | 0.724 |  |
| Large                       | 0.3 (0.1)   | 0.3 (0.1)   | 0.3 (0.1)   | 0.007 | 0.3 (0.1)   | 0.3 (0.1)   | 0.3 (0.1)   | 0.128 | 0.30 (0.1)  | 0.3 (0.0)   | 0.3 (0.0)   | 0.868 | 0.3 (0.1)   | 0.3 (0.1)   | 0.3 (0.0)   | 0.907 |  |
| Medium                      | 10.3 (2.3)  | 11.0 (2.9)  | 10.7 (2.2)  | 0.177 | 10.3 (2.4)  | 10.5 (2.4)  | 10.8 (2.2)  | 0.323 | 10.1 (2.5)  | 9.71 (2.0)  | 10.1 (2.1)  | 0.957 | 10.1 (2.1)  | 10.2 (2.6)  | 9.87 (2.1)  | 0.583 |  |
| Small                       | 19.9 (4.3)  | 21.3 (4.3)  | 20.2 (3.8)  | 0.357 | 20.0 (4.4)  | 20.1 (4.1)  | 20.9 (3.8)  | 0.323 | 20.7 (4.3)  | 21.5 (3.9)  | 21.1 (3.8)  | 0.868 | 21.2 (4.1)  | 21.1 (4.2)  | 20.9 (4.0)  | 0.834 |  |
| HDL-P composition           |             |             |             |       |             |             |             |       |             |             |             |       |             |             |             |       |  |
| (mg/dL)                     |             |             |             |       |             |             |             |       |             |             |             |       |             |             |             |       |  |
| HDL-C                       | 59.7 (13.4) | 64.4 (15.8) | 61.9 (11.6) | 0.177 | 60.3 (13.8) | 61.0 (14.2) | 63.0 (11.2) | 0.323 | 60.5 (14.7) | 59.1 (12.8) | 60.7 (11.8) | 0.957 | 61.0 (12.8) | 61.7 (14.8) | 59.2 (12.2) | 0.459 |  |
| HDL-TG                      | 14.4 (4.6)  | 15.1 (4.2)  | 14.6 (4.9)  | 0.645 | 14.3 (4.7)  | 14.5 (4.3)  | 15.2 (5.0)  | 0.337 | 14.7 (4.0)  | 16.0 (3.4)  | 14.9 (3.8)  | 0.873 | 14.9 (4.2)  | 14.5 (3.1)  | 15.4 (4.0)  | 0.444 |  |
| HDL-P size                  | 8.2 (0.1)   | 8.2 (0.1)   | 8.3 (0.1)   | 0.563 | 8.2 (0.1)   | 8.2 (0.1)   | 8.2 (0.1)   | 0.855 | 8.2 (0.1)   | 8.2 (0.1)   | 8.2 (0.1)   | 0.868 | 8.2 (0.1)   | 8.2 (0.1)   | 8.2 (0.1)   | 0.834 |  |
| IDL-P composition           |             |             |             |       |             |             |             |       |             |             |             |       |             |             |             |       |  |
| (mg/dL)                     |             |             |             |       |             |             |             |       |             |             |             |       |             |             |             |       |  |
| IDL-C                       | 9.06 (4.8)  | 10.2 (5.0)  | 10.7 (5.1)  | 0.025 | 9.2 (4.8)   | 9.9 (5.0)   | 10.5 (5.1)  | 0.223 | 12.1 (5.1)  | 13.6 (5.7)  | 12.1 (4.5)  | 0.957 | 12.3 (5.0)  | 11.6 (5.0)  | 13.0 (5.0)  | 0.421 |  |
| IDL-TG                      | 11.0 (4.0)  | 12.0 (4.0)  | 11.7 (4.1)  | 0.210 | 11.0 (3.8)  | 11.5 (4.1)  | 11.9 (4.4)  | 0.323 | 13.4 (3.9)  | 15.0 (4.5)  | 13.4 (3.7)  | 0.957 | 13.5 (3.8)  | 13.1 (3.8)  | 14.3 (4.1)  | 0.322 |  |
| Other atherogenic variables |             |             |             |       |             |             |             |       |             |             |             |       |             |             |             |       |  |
| Non-HDL-P                   | 1213.0      | 1294.0      | 1348.0      | 0.001 | 1224.0      | 1292.0      | 1308.0      | 0.128 | 1415 (269)  | 1415 (252)  | 1379 (244)  | 0.862 | 1442.0      | 1365.0      | 1404.0      | 0.743 |  |
| (nmol/L)                    | (262.0)     | (249.0)     | (312.0)     |       | (264.0)     | (293.0)     | (287.0)     |       |             |             |             |       | (254.0)     | (261.0)     | (250.0)     |       |  |
| Total-P/HDL-P               | 42.7 (13.1) | 42.3 (11.0) | 45.6 (14.5) | 0.174 | 42.7 (12.7) | 44.7 (14.8) | 42.9 (11.6) | 0.775 | 48.7 (14.8) | 47.6 (13.8) | 46.1 (11.0) | 0.862 | 48.4 (13.0) | 45.9 (13.3) | 47.9 (13.2) | 0.956 |  |
| LDL-P/HDL-P                 | 41.2 (12.4) | 41.1 (10.4) | 44.5 (14.2) | 0.120 | 41.4 (12.1) | 43.3 (14.1) | 41.7 (11.3) | 0.775 | 47.0 (14.2) | 45.5 (12.7) | 44.6 (10.8) | 0.862 | 46.8 (12.5) | 44.3 (12.6) | 46.1 (12.6) | 0.950 |  |

Data are shown as mean (SD). HDL high-density lipoprotein, HDL-C cholesterol content in HDL, HDL-P HDL particles, HDL-TG triglyceride content in HDL, IDL intermediate-density lipopro-tein, IDL-C cholesterol content in IDL, IDL-TG triglyceride content in IDL, LDL low-density lipo-protein, LDL-C cholesterol content in LDL, LDL-P LDL particles, LDL-TG triglyceride content in LDL, NMR nuclear magnetic resonance, VLDL very lowdensity lipoprotein, VLDL-C cholesterol content in VLDL, VLDL-P VLDL particles, VLDL-TG triglyceride content in VLD. T1=poor adherence, T2=moderate adherence, and T3=high adherence

**Table S7:** The advanced lipoprotein profile, the alternate Mediterranean Diet score and the alternate Healthy Eating Index by age groups in men

| aMED                       |                      |                   |                    |       |                       |                  |                     |       | aHEI                   |                        |                      |       |                        |                      |                       |       |
|----------------------------|----------------------|-------------------|--------------------|-------|-----------------------|------------------|---------------------|-------|------------------------|------------------------|----------------------|-------|------------------------|----------------------|-----------------------|-------|
| Characteristics            | <50 years            |                   |                    |       | ≥50 years             |                  |                     |       | <50 years              |                        |                      |       | ≥50 years              |                      |                       |       |
|                            | T1 [0-4]<br>(N= 173) | T2 [4]<br>(N= 55) | T3 [5-9]<br>(N=90) | P     | T1 [0-4]<br>(N = 118) | T2 [4]<br>(N=67) | T3 [5-9]<br>(N=128) | P     | T1 [20-38]<br>(N= 140) | T2 [38-44]<br>(N= 109) | T3 [44-68]<br>(N=69) | P     | T1 [20-38]<br>(N = 66) | T2 [38-44]<br>(N=94) | T3 [44-68]<br>(N=153) | p     |
| VLDL-P number (nmol/L)     |                      |                   |                    |       |                       |                  |                     |       |                        |                        |                      |       |                        |                      |                       |       |
| Total                      | 54.1 (50.5)          | 52.5 (51.5)       | 46.5 (31.8)        | 0.661 | 63.6 (55.6)           | 57.1 (39.1)      | 57.1 (37.7)         | 0.843 | 52.9 (51.3)            | 48.8 (42.5)            | 55.3 (42.2)          | 0.970 | 61.4 (54.3)            | 62.0 (45.9)          | 56.1 (35.2)           | 0.901 |
| Large                      | 1.3 (1.1)            | 1.3 (1.1)         | 1.1 (0.7)          | 0.661 | 1.5 (1.2)             | 1.4 (0.8)        | 1.4 (0.8)           | 0.843 | 1.3 (1.2)              | 1.2 (0.9)              | 1.3 (0.9)            | 0.970 | 1.5 (1.1)              | 1.5 (0.9)            | 1.3 (0.7)             | 0.901 |
| Medium                     | 5.7 (7.3)            | 5.5 (8.8)         | 4.7 (3.5)          | 0.661 | 6.3 (9.9)             | 5.5 (5.0)        | 5.5 (4.1)           | 0.843 | 5.5 (7.7)              | 5.3 (7.1)              | 5.3 (4.0)            | 0.970 | 6.4 (10.6)             | 5.4 (4.2)            | 5.5 (3.5)             | 0.901 |
| Small                      | 47.1 (42.7)          | 45.7 (43.0)       | 40.6 (28.3)        | 0.661 | 55.8 (46.0)           | 50.2 (34.0)      | 50.3 (33.4)         | 0.843 | 46.1 (43.2)            | 42.4 (35.3)            | 48.7 (38.2)          | 0.970 | 53.5 (43.7)            | 55.1 (41.3)          | 49.3 (31.4)           | 0.901 |
| VLDL-P composition (mg/dL) |                      |                   |                    |       |                       |                  |                     |       |                        |                        |                      |       |                        |                      |                       |       |
| VLDL-C                     | 13.2 (13.5)          | 13.1 (14.0)       | 11.3 (10.2)        | 0.661 | 15.9 (15.5)           | 13.6 (10.0)      | 14.7 (12.2)         | 0.895 | 12.8 (13.5)            | 12.1 (12.0)            | 13.5 (12.8)          | 0.970 | 15.2 (14.7)            | 15.2 (13.6)          | 14.3 (10.9)           | 0.951 |
| VLDL-TG                    | 79.0 (78.6)          | 76.3 (81.6)       | 67.0 (44.0)        | 0.661 | 92.1 (89.0)           | 82.5 (58.6)      | 81.4 (52.2)         | 0.843 | 77.2 (80.6)            | 71.1 (66.9)            | 79.4 (57.7)          | 0.970 | 89.6 (90.2)            | 88.4 (63.3)          | 80.1 (49.0)           | 0.901 |
| VLDL-P size (nm)           | 42.1 (0.2)           | 42.2 (0.3)        | 42.1 (0.3)         | 0.905 | 42.1 (0.2)            | 42.1 (0.2)       | 42.1 (0.2)          | 0.993 | 42.1 (0.2)             | 42.2 (0.2)             | 42.1 (0.2)           | 0.970 | 42.1 (0.2)             | 42.0 (0.2)           | 42.1 (0.2)            | 0.951 |
| LDL-P number (nmol/L)      |                      |                   |                    |       |                       |                  |                     |       |                        |                        |                      |       |                        |                      |                       |       |
| Total                      | 1325.0 (251.0)       | 1295.0 (286.0)    | 1369.0 (300.0)     | 0.661 | 1322.0 (215.0)        | 1312.0 (278.0)   | 1281.0 (246.0)      | 0.843 | 1324.0 (271.0)         | 1338.0 (249.0)         | 1329.0 (321.0)       | 0.970 | 1336.0 (231.0)         | 1258.0 (247.0)       | 1311.0 (246.0)        | 0.901 |
| Large                      | 181.0 (32.8)         | 179.0 (37.3)      | 186.0 (38.8)       | 0.661 | 180.0 (30.4)          | 174.0 (35.7)     | 174.0 (32.7)        | 0.843 | 181.0 (33.8)           | 183.0 (32.7)           | 180.0 (43.9)         | 0.970 | 180.0 (32.3)           | 168.0 (30.1)         | 180.0 (33.8)          | 0.951 |
| Medium                     | 399.0 (127.0)        | 388.0 (140.0)     | 429.0 (149.0)      | 0.661 | 393.0 (122.0)         | 387.0 (147.0)    | 362.0 (114.0)       | 0.843 | 401.0 (131.0)          | 410.0 (125.0)          | 401.0 (169.0)        | 0.970 | 396.0 (125.0)          | 357.0 (121.0)        | 384.0 (130.0)         | 0.901 |
| Small                      | 745.0 (139.0)        | 728.0 (145.0)     | 754.0 (148.0)      | 0.905 | 749.0 (110.0)         | 751.0 (134.0)    | 746.0 (138.0)       | 0.993 | 742.0 (150.0)          | 744.0 (129.0)          | 748.0 (148.0)        | 0.970 | 760.0 (123.0)          | 733.0 (131.0)        | 747.0 (124.0)         | 0.901 |
| LDL-P composition (mg/dL)  |                      |                   |                    |       |                       |                  |                     |       |                        |                        |                      |       |                        |                      |                       |       |
| LDL-C                      | 128.0 (24.6)         | 126.0 (28.4)      | 133.0 (29.9)       | 0.661 | 126.0 (22.9)          | 125.0 (28.6)     | 121.0 (23.9)        | 0.843 | 128.0 (25.8)           | 130.0 (24.9)           | 128.0 (33.1)         | 0.970 | 128.0 (24.0)           | 118.0 (25.4)         | 125.0 (24.4)          | 0.901 |
| LDL-TG                     | 15.8 (4.8)           | 15.3 (5.2)        | 16.5 (5.3)         | 0.661 | 16.9 (4.4)            | 16.6 (4.8)       | 16.3 (5.0)          | 0.843 | 15.8 (5.2)             | 15.8 (4.6)             | 16.2 (5.7)           | 0.970 | 16.7 (4.5)             | 16.3 (4.5)           | 16.9 (5.1)            | 0.951 |
| LDL-P size (nm)            | 20.9 (0.3)           | 20.9 (0.3)        | 20.9 (0.3)         | 0.717 | 20.9 (0.3)            | 20.8 (0.3)       | 20.8 (0.2)          | 0.843 | 20.9 (0.3)             | 20.9 (0.3)             | 20.9 (0.3)           | 0.970 | 20.9 (0.3)             | 20.8 (0.3)           | 20.9 (0.3)            | 0.997 |
| HDL-P number (μmol/L)      |                      |                   |                    |       |                       |                  |                     |       |                        |                        |                      |       |                        |                      |                       |       |

|                                   |                   |                   |                   |       |                   |                   |                   |       |                   |                   |                   |       |                   |                   |                   |       |
|-----------------------------------|-------------------|-------------------|-------------------|-------|-------------------|-------------------|-------------------|-------|-------------------|-------------------|-------------------|-------|-------------------|-------------------|-------------------|-------|
| Total                             | 27.2 (5.3)        | 26.8 (5.3)        | 28.5 (5.4)        | 0.661 | 27.0 (5.7)        | 26.9 (5.0)        | 27.2 (5.2)        | 0.993 | 27.5 (5.2)        | 27.2 (5.1)        | 27.7 (6.1)        | 0.970 | 27.9 (5.9)        | 26.1 (4.6)        | 26.9 (5.1)        | 0.901 |
| Large                             | 0.3 (0.1)         | 0.3 (0.0)         | 0.3 (0.1)         | 0.717 | 0.3 (0.0)         | 0.3 (0.0)         | 0.3 (0.0)         | 0.993 | 0.3 (0.1)         | 0.3 (0.0)         | 0.3 (0.1)         | 0.970 | 0.3 (0.0)         | 0.3 (0.0)         | 0.3 (0.0)         | 0.901 |
| Medium                            | 8.4 (1.7)         | 8.3 (1.8)         | 8.7 (1.9)         | 0.661 | 8.6 (2.0)         | 8.4 (1.8)         | 8.6 (2.0)         | 0.998 | 8.5 (1.8)         | 8.4 (1.7)         | 8.5 (2.03)        | 0.970 | 8.6 (2.0)         | 8.4 (1.9)         | 8.6 (2.0)         | 0.963 |
| Small                             | 18.6 (4.2)        | 18.2 (4.2)        | 19.5 (4.1)        | 0.661 | 18.2 (4.4)        | 18.2 (4.0)        | 18.4 (4.0)        | 0.993 | 18.7 (4.2)        | 18.6 (4.00)       | 19.0 (4.50)       | 0.970 | 19.1 (4.6)        | 17.4 (3.7)        | 18.0 (3.7)        | 0.901 |
| HDL-P<br>composition<br>(mg/dL)   |                   |                   |                   |       |                   |                   |                   |       |                   |                   |                   |       |                   |                   |                   |       |
| HDL-C                             | 51.9 (11.0)       | 51.5 (11.2)       | 55.1 (12.3)       | 0.661 | 51.0 (12.6)       | 51.0 (10.8)       | 51.3 (11.6)       | 0.993 | 52.7 (10.7)       | 52.5 (11.1)       | 52.7 (13.9)       | 0.970 | 52.8 (12.7)       | 48.7 (10.1)       | 51.2 (11.8)       | 0.901 |
| HDL-TG                            | 12.3 (4.9)        | 11.8 (4.6)        | 12.2 (4.4)        | 0.905 | 13.4 (4.6)        | 12.8 (3.4)        | 13.4 (4.8)        | 0.993 | 12.3 (4.83)       | 11.6 (4.5)        | 12.8 (4.9)        | 0.970 | 13.2 (4.3)        | 13.7 (5.5)        | 12.9 (3.4)        | 0.951 |
| HDL-P size<br>(nm)                | 8.2 (0.1)         | 8.2 (0.1)         | 8.2 (0.1)         | 0.905 | 8.2 (0.1)         | 8.2 (0.1)         | 8.2 (0.1)         | 0.993 | 8.2 (0.1)         | 8.2 (0.1)         | 8.2 (0.1)         | 0.970 | 8.2 (0.1)         | 8.2 (0.1)         | 8.2 (0.1)         | 0.901 |
| IDL-P<br>composition<br>(mg/dL)   |                   |                   |                   |       |                   |                   |                   |       |                   |                   |                   |       |                   |                   |                   |       |
| IDL-C                             | 9.6 (4.2)         | 9.5 (4.3)         | 10.0 (4.5)        | 0.840 | 11.6 (4.6)        | 11.7 (3.8)        | 11.4 (4.6)        | 0.993 | 9.7 (4.2)         | 9.4 (4.0)         | 10.1 (5.0)        | 0.970 | 11.7 (4.6)        | 11.4 (4.3)        | 11.6 (4.3)        | 0.951 |
| IDL-TG                            | 11.3 (3.4)        | 10.9 (3.5)        | 11.5 (3.7)        | 0.905 | 13.0 (3.8)        | 12.8 (3.4)        | 13.0 (3.9)        | 0.998 | 11.3 (3.4)        | 10.9 (3.2)        | 11.9 (4.3)        | 0.970 | 12.9 (3.6)        | 12.9 (4.1)        | 13.1 (3.7)        | 0.951 |
| Other<br>atherogenic<br>variables |                   |                   |                   |       |                   |                   |                   |       |                   |                   |                   |       |                   |                   |                   |       |
| Non-HDL-P<br>(nmol/L)             | 1351.0<br>(255.0) | 1320.0<br>(290.0) | 1387.0<br>(309.0) | 0.717 | 1359.0<br>(215.0) | 1342.0<br>(276.0) | 1311.0<br>(255.0) | 0.843 | 1349.0<br>(275.0) | 1359.0<br>(255.0) | 1357.0<br>(324.0) | 0.970 | 1369.0<br>(238.0) | 1294.0<br>(239.0) | 1340.0<br>(254.0) | 0.901 |
| Total-P/HDL-P                     | 52.2 (12.8)       | 53.0 (17.8)       | 51.7 (15.9)       | 0.905 | 53.2 (12.5)       | 52.4 (13.4)       | 51.4 (15.7)       | 0.843 | 51.7 (13.7)       | 53.0 (14.8)       | 52.3 (17.1)       | 0.970 | 52.2 (13.9)       | 52.1 (12.5)       | 52.9 (15.0)       | 0.951 |
| LDL-P/HDL-P                       | 50.2 (12.4)       | 50.8 (16.9)       | 49.9 (15.2)       | 0.953 | 50.7 (12.0)       | 50.1 (12.7)       | 49.2 (14.9)       | 0.843 | 49.7 (13.3)       | 51.0 (14.0)       | 50.1 (16.3)       | 0.970 | 49.9 (13.2)       | 49.6 (12.2)       | 50.6 (14.2)       | 0.951 |

Data are shown as mean (SD). HDL high-density lipoprotein, HDL-C cholesterol content in HDL, HDL-P HDL particles, HDL-TG triglyceride content in HDL, IDL intermediate-density lipoprotein, IDL-C cholesterol content in IDL, IDL-TG triglyceride content in IDL, LDL low-density lipoprotein, LDL-C cholesterol content in LDL, LDL-P LDL particles, LDL-TG triglyceride content in LDL, NMR nuclear magnetic resonance, VLDL very low-density lipoprotein, VLDL-C cholesterol content in VLDL, VLDL-P VLDL particles, VLDL-TG triglyceride content in VLD. T1=poor adherence, T2=moderate adherence, and T3=high adherence

**Table S8:** The advanced lipoprotein profile, the alternate Mediterranean Diet score and the alternate Healthy Eating Index by age groups in women

| Characteristics                  | aMED                 |                   |                    |        |                       |                   |                     |       | aHEI                   |                        |                      |       |                        |                      |                       |       |
|----------------------------------|----------------------|-------------------|--------------------|--------|-----------------------|-------------------|---------------------|-------|------------------------|------------------------|----------------------|-------|------------------------|----------------------|-----------------------|-------|
|                                  | <50 years            |                   |                    |        | ≥50 years             |                   |                     |       | <50 years              |                        |                      |       | ≥50 years              |                      |                       |       |
|                                  | T1 [0-4]<br>(N= 173) | T2 [4]<br>(N= 55) | T3 [5-9]<br>(N=90) | P      | T1 [0-4]<br>(N = 118) | T2 [4]<br>(N=67)  | T3 [5-9]<br>(N=128) | P     | T1 [20-38]<br>(N= 140) | T2 [38-44]<br>(N= 109) | T3 [44-68]<br>(N=69) | P     | T1 [20-38]<br>(N = 66) | T2 [38-44]<br>(N=94) | T3 [44-68]<br>(N=153) | p     |
| VLDL-P<br>number<br>(nmol/L)     |                      |                   |                    |        |                       |                   |                     |       |                        |                        |                      |       |                        |                      |                       |       |
| Total                            | 39.4 (27.2)          | 36.4 (20.2)       | 35.0 (23.5)        | 0.210  | 47.7 (25.2)           | 60.8 (42.9)       | 44.4 (27.5)         | 0.868 | 36.6 (23.4)            | 38.7 (27.2)            | 38.1 (25.2)          | 0.775 | 45.1 (26.1)            | 46.0 (28.2)          | 52.9 (34.5)           | 0.322 |
| Large                            | 1.0 (0.6)            | 0.9 (0.4)         | 0.9 (0.5)          | 0.086  | 1.1 (0.5)             | 1.4 (0.9)         | 1.1 (0.6)           | 0.868 | 0.9 (0.5)              | 1.0 (0.6)              | 1.0 (0.5)            | 0.775 | 1.1 (0.5)              | 1.1 (0.6)            | 1.25 (0.7)            | 0.322 |
| Medium                           | 3.9 (2.8)            | 3.6 (2.0)         | 3.3 (2.2)          | 0.072  | 4.4 (2.6)             | 5.5 (4.4)         | 4.4 (3.0)           | 0.957 | 3.8 (2.4)              | 3.7 (2.7)              | 3.6 (2.4)            | 0.775 | 4.2 (2.4)              | 4.6 (3.4)            | 4.9 (3.4)             | 0.378 |
| Small                            | 34.5 (24.3)          | 31.9 (18.2)       | 30.9 (21.1)        | 0.236  | 42.2 (22.7)           | 53.9 (38.2)       | 38.9 (24.3)         | 0.862 | 31.9 (20.9)            | 34.1 (24.3)            | 33.5 (22.6)          | 0.775 | 39.8 (23.7)            | 40.3 (24.7)          | 46.8 (30.9)           | 0.322 |
| VLDL-P<br>composition<br>(mg/dL) |                      |                   |                    |        |                       |                   |                     |       |                        |                        |                      |       |                        |                      |                       |       |
| VLDL-C                           | 9.6 (8.8)            | 8.6 (7.2)         | 8.6 (7.2)          | 0.357  | 11.9 (8.3)            | 15.1 (12.2)       | 10.6 (8.7)          | 0.862 | 8.9 (8.0)              | 9.2 (8.4)              | 9.3 (8.0)            | 0.775 | 11.0 (8.4)             | 11.0 (8.4)           | 13.1 (10.6)           | 0.325 |
| VLDL-TG                          | 56.8 (37.5)          | 52.1 (26.9)       | 49.4 (32.3)        | 0.164  | 67.6 (34.1)           | 86.5 (60.8)       | 64.0 (38.5)         | 0.868 | 52.7 (32.0)            | 55.3 (37.7)            | 54.1 (34.5)          | 0.775 | 64.0 (35.1)            | 66.3 (40.9)          | 75.2 (47.9)           | 0.322 |
| VLDL-P size<br>(nm)              | 42.1 (0.2)           | 42.1 (0.2)        | 42.1 (0.2)         | 0.027  | 42.1 (0.2)            | 42.0 (0.2)        | 42.1 (0.2)          | 0.862 | 42.2 (0.2)             | 42.1 (0.2)             | 42.1 (0.2)           | 0.085 | 42.1 (0.2)             | 42.1 (0.2)           | 42.1 (0.2)            | 0.473 |
| LDL-P number<br>(nmol/L)         |                      |                   |                    |        |                       |                   |                     |       |                        |                        |                      |       |                        |                      |                       |       |
| Total                            | 1204.0<br>(252.0)    | 1290.0<br>(241.0) | 1344.0<br>(304.0)  | <0.001 | 1398.0<br>(260.0)     | 1386.0<br>(243.0) | 1366.0<br>(245.0)   | 0.862 | 1218.0<br>(255.0)      | 1284.0<br>(284.0)      | 1302.0<br>(277.0)    | 0.128 | 1428.0<br>(249.0)      | 1351.0<br>(253.0)    | 1382.0<br>(247.0)     | 0.583 |
| Large                            | 178.0 (31.9)         | 189.0 (35.7)      | 195.0 (37.9)       | 0.001  | 195.0 (36.2)          | 187.0 (37.1)      | 190.0 (34.6)        | 0.862 | 182.0 (33.6)           | 185.0 (36.7)           | 189.0 (35.4)         | 0.323 | 201.0 (38.1)           | 186.0 (34.7)         | 190.0 (34.8)          | 0.325 |
| Medium                           | 386.0<br>(124.0)     | 438.0<br>(123.0)  | 470.0<br>(155.0)   | <0.001 | 466.0<br>(135.0)      | 445.0<br>(132.0)  | 457.0<br>(132.0)    | 0.873 | 405.0<br>(131.0)       | 426.0<br>(150.0)       | 437.0<br>(133.0)     | 0.303 | 492.0<br>(141.0)       | 436.0<br>(125.0)     | 456.0<br>(132.0)      | 0.384 |
| Small                            | 640.0<br>(131.0)     | 663.0<br>(112.0)  | 679.0<br>(141.0)   | 0.050  | 737.0<br>(131.0)      | 754 (123)         | 720.0<br>(117.0)    | 0.862 | 631.0<br>(122.0)       | 673.0<br>(132.0)       | 676.0<br>(141.0)     | 0.107 | 735.0<br>(109.0)       | 728.0<br>(134.0)     | 736.0<br>(125.0)      | 0.907 |
| LDL-P<br>composition<br>(mg/dL)  |                      |                   |                    |        |                       |                   |                     |       |                        |                        |                      |       |                        |                      |                       |       |
| LDL-C                            | 119.0 (24.8)         | 128.0 (24.1)      | 133.0 (30.6)       | <0.001 | 136.0 (26.1)          | 133.0 (25.0)      | 133.0 (25.7)        | 0.862 | 121.0 (25.5)           | 126.0 (29.0)           | 129.0 (26.9)         | 0.155 | 141.0 (25.8)           | 131.0 (25.1)         | 134.0 (25.7)          | 0.378 |
| LDL-TG                           | 15.3 (5.0)           | 17.1 (5.1)        | 17.9 (5.4)         | <0.001 | 18.5 (5.1)            | 18.8 (5.1)        | 18.4 (4.3)          | 0.957 | 15.9 (5.3)             | 16.6 (5.3)             | 16.9 (5.1)           | 0.323 | 19.0 (5.4)             | 17.6 (4.8)           | 18.9 (4.4)            | 0.834 |
| LDL-P size (nm)                  | 21.1 (0.3)           | 21.1 (0.2)        | 21.2 (0.2)         | 0.028  | 21.0 (0.3)            | 21.0 (0.3)        | 21.0 (0.3)          | 0.957 | 21.1 (0.2)             | 21.1 (0.2)             | 21.1 (0.2)           | 0.562 | 21.1 (0.3)             | 21.0 (0.25)          | 21.0 (0.26)           | 0.325 |
| HDL-P number<br>(μmol/L)         |                      |                   |                    |        |                       |                   |                     |       |                        |                        |                      |       |                        |                      |                       |       |
| Total                            | 30.4 (6.0)           | 32.6 (6.7)        | 31.2 (5.5)         | 0.231  | 31.1 (6.2)            | 31.5 (5.3)        | 31.4 (5.0)          | 0.905 | 30.6 (6.3)             | 30.9 (6.0)             | 32.0 (5.3)           | 0.323 | 31.5 (5.5)             | 31.6 (6.0)           | 31.1 (5.3)            | 0.724 |

|                                   |                   |                   |                   |       |             |             |             |       |                   |                   |                   |       |                   |                   |                   |       |
|-----------------------------------|-------------------|-------------------|-------------------|-------|-------------|-------------|-------------|-------|-------------------|-------------------|-------------------|-------|-------------------|-------------------|-------------------|-------|
| Large                             | 0.3 (0.1)         | 0.3 (0.1)         | 0.3 (0.1)         | 0.007 | 0.30 (0.1)  | 0.3 (0.0)   | 0.3 (0.0)   | 0.868 | 0.3 (0.1)         | 0.3 (0.1)         | 0.3 (0.1)         | 0.128 | 0.3 (0.1)         | 0.3 (0.1)         | 0.3 (0.0)         | 0.907 |
| Medium                            | 10.3 (2.3)        | 11.0 (2.9)        | 10.7 (2.2)        | 0.177 | 10.1 (2.5)  | 9.71 (2.0)  | 10.1 (2.1)  | 0.957 | 10.3 (2.4)        | 10.5 (2.4)        | 10.8 (2.2)        | 0.323 | 10.1 (2.1)        | 10.2 (2.6)        | 9.87 (2.1)        | 0.583 |
| Small                             | 19.9 (4.3)        | 21.3 (4.3)        | 20.2 (3.8)        | 0.357 | 20.7 (4.3)  | 21.5 (3.9)  | 21.1 (3.8)  | 0.868 | 20.0 (4.4)        | 20.1 (4.1)        | 20.9 (3.8)        | 0.323 | 21.2 (4.1)        | 21.1 (4.2)        | 20.9 (4.0)        | 0.834 |
| HDL-P<br>composition<br>(mg/dL)   |                   |                   |                   |       |             |             |             |       |                   |                   |                   |       |                   |                   |                   |       |
| HDL-C                             | 59.7 (13.4)       | 64.4 (15.8)       | 61.9 (11.6)       | 0.177 | 60.5 (14.7) | 59.1 (12.8) | 60.7 (11.8) | 0.957 | 60.3 (13.8)       | 61.0 (14.2)       | 63.0 (11.2)       | 0.323 | 61.0 (12.8)       | 61.7 (14.8)       | 59.2 (12.2)       | 0.459 |
| HDL-TG                            | 14.4 (4.6)        | 15.1 (4.2)        | 14.6 (4.9)        | 0.645 | 14.7 (4.0)  | 16.0 (3.4)  | 14.9 (3.8)  | 0.873 | 14.3 (4.7)        | 14.5 (4.3)        | 15.2 (5.0)        | 0.337 | 14.9 (4.2)        | 14.5 (3.1)        | 15.4 (4.0)        | 0.444 |
| HDL-P size<br>(nm)                | 8.2 (0.1)         | 8.2 (0.1)         | 8.3 (0.1)         | 0.563 | 8.2 (0.1)   | 8.2 (0.1)   | 8.2 (0.1)   | 0.868 | 8.2 (0.1)         | 8.2 (0.1)         | 8.2 (0.1)         | 0.855 | 8.2 (0.1)         | 8.2 (0.1)         | 8.2 (0.1)         | 0.834 |
| IDL-P<br>composition<br>(mg/dL)   |                   |                   |                   |       |             |             |             |       |                   |                   |                   |       |                   |                   |                   |       |
| IDL-C                             | 9.06 (4.8)        | 10.2 (5.0)        | 10.7 (5.1)        | 0.025 | 12.1 (5.1)  | 13.6 (5.7)  | 12.1 (4.5)  | 0.957 | 9.2 (4.8)         | 9.9 (5.0)         | 10.5 (5.1)        | 0.223 | 12.3 (5.0)        | 11.6 (5.0)        | 13.0 (5.0)        | 0.421 |
| IDL-TG                            | 11.0 (4.0)        | 12.0 (4.0)        | 11.7 (4.1)        | 0.210 | 13.4 (3.9)  | 15.0 (4.5)  | 13.4 (3.7)  | 0.957 | 11.0 (3.8)        | 11.5 (4.1)        | 11.9 (4.4)        | 0.323 | 13.5 (3.8)        | 13.1 (3.8)        | 14.3 (4.1)        | 0.322 |
| Other<br>atherogenic<br>variables |                   |                   |                   |       |             |             |             |       |                   |                   |                   |       |                   |                   |                   |       |
| Non-HDL-P<br>(nmol/L)             | 1213.0<br>(262.0) | 1294.0<br>(249.0) | 1348.0<br>(312.0) | 0.001 | 1415 (269)  | 1415 (252)  | 1379 (244)  | 0.862 | 1224.0<br>(264.0) | 1292.0<br>(293.0) | 1308.0<br>(287.0) | 0.128 | 1442.0<br>(254.0) | 1365.0<br>(261.0) | 1404.0<br>(250.0) | 0.743 |
| Total-P/HDL-P                     | 42.7 (13.1)       | 42.3 (11.0)       | 45.6 (14.5)       | 0.174 | 48.7 (14.8) | 47.6 (13.8) | 46.1 (11.0) | 0.862 | 42.7 (12.7)       | 44.7 (14.8)       | 42.9 (11.6)       | 0.775 | 48.4 (13.0)       | 45.9 (13.3)       | 47.9 (13.2)       | 0.956 |
| LDL-P/HDL-P                       | 41.2 (12.4)       | 41.1 (10.4)       | 44.5 (14.2)       | 0.120 | 47.0 (14.2) | 45.5 (12.7) | 44.6 (10.8) | 0.862 | 41.4 (12.1)       | 43.3 (14.1)       | 41.7 (11.3)       | 0.775 | 46.8 (12.5)       | 44.3 (12.6)       | 46.1 (12.6)       | 0.950 |

Data are shown as mean (SD). HDL high-density lipoprotein, HDL-C cholesterol content in HDL, HDL-P HDL particles, HDL-TG triglyceride content in HDL, IDL intermediate-density lipopro-tein, IDL-C cholesterol content in IDL, IDL-TG triglyceride content in IDL, LDL low-density lipo-protein, LDL-C cholesterol content in LDL, LDL-P LDL particles, LDL-TG triglyceride content in LDL, NMR nuclear magnetic resonance, VLDL very lowdensity lipoprotein, VLDL-C cholesterol content in VLDL, VLDL-P VLDL particles, VLDL-TG triglyceride content in VLD. T1=poor adherence, T2=moderate adherence, and T3=high adherence
